# Supplementary material for: SnOxS2−x/GNS nanocomposites for reversible and high-capacity lithium-ion batteries
Source: Royal Society of Chemistry journal article supplement (doi:10.1039/d3se00141e), 2023-01-01
Supplement: d3se00141e1.pdf [file d3se00141e1.pdf]

## Supporting Information

### **SnO<sub>x</sub>S<sub>2-x</sub>/GNS nanocomposites for reversible and high-capacity lithium-ion batteries**

Ke Yang <sup>a</sup>, Changyu Yan <sup>a</sup>, Xuejiao Liu <sup>a</sup>, Qihan Chen <sup>b</sup>, Boxu Dong <sup>a</sup>, Hongran Guo <sup>a</sup>,  
Xuefeng Qian <sup>\*a</sup>

<sup>a</sup>. *Shanghai Electrochemical Energy Devices Research Center, School of Chemistry and Chemical Engineering, State Key Laboratory of Metal Matrix Composites, Shanghai Jiao Tong University, Shanghai, 200240, P. R. China.*

<sup>b</sup>. *Denison University, Granville, Ohio 43023, USA.*

\* Corresponding author.

E-mail: xfqian@sjtu.edu.cn (Xuefeng Qian)

Tel: +86-21-54743262

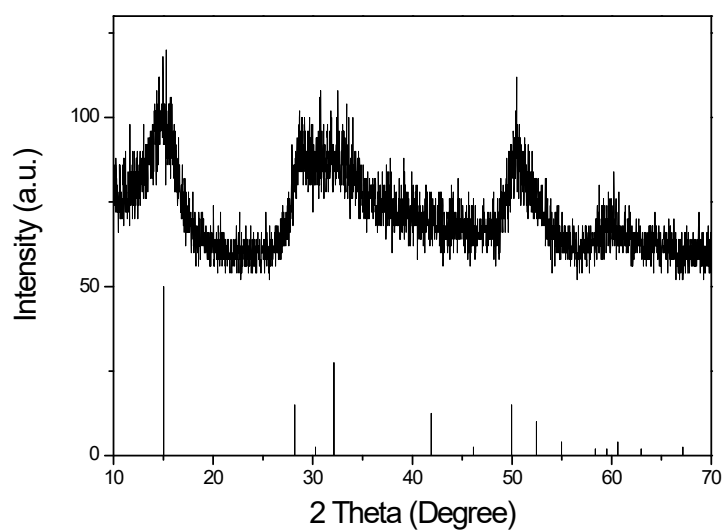

Figure S1. XRD pattern of SnO<sub>0.3</sub>S<sub>1.7</sub>/GNS composites synthesized with 0.1 g GO by ultrasonic method (top) and standard pattern (bottom) of Berndtite-2 T type SnS<sub>2</sub> (JCPDS card No. 23-667).

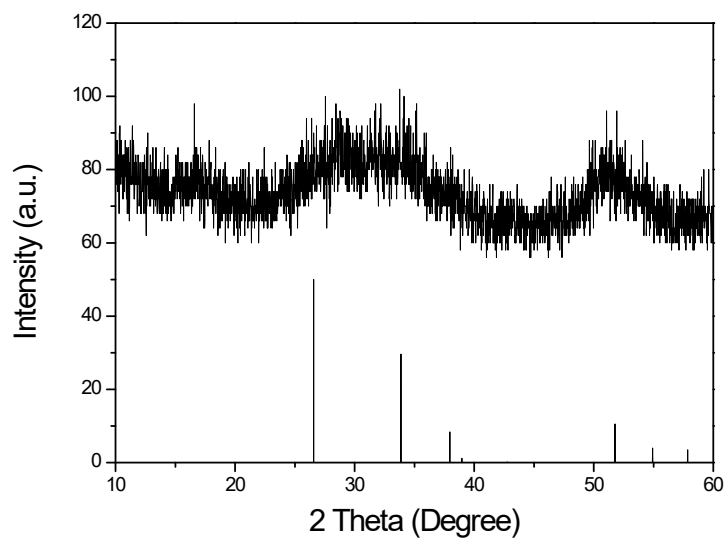

Figure S2. XRD pattern of SnO<sub>1.2</sub>S<sub>0.8</sub>/GNS composites synthesized with 0.4 g GO by ultrasonic method (top) and standard pattern (bottom) of Cassiterite type SnO<sub>2</sub> (JCPDS No.77-451).

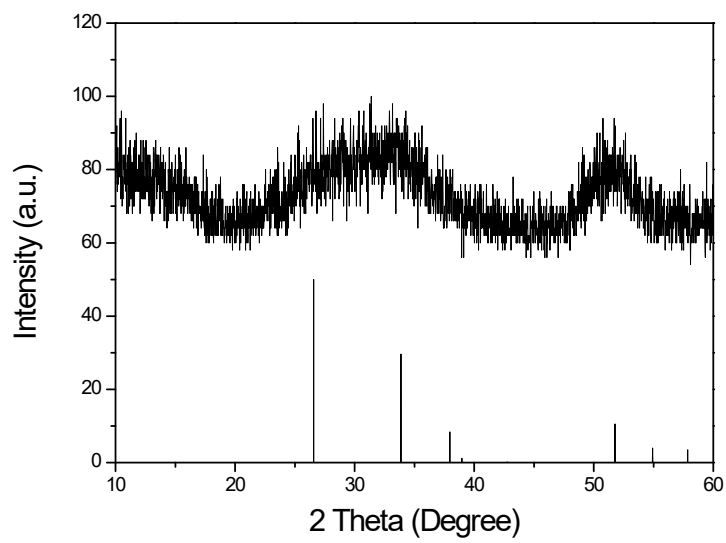

Figure S3. XRD pattern of SnO<sub>1.3</sub>S<sub>0.7</sub>/GNS composites synthesized with 0.5 g GO by ultrasonic method (top) and standard pattern (bottom) of Cassiterite type SnO<sub>2</sub> (JCPDS No.77-451).

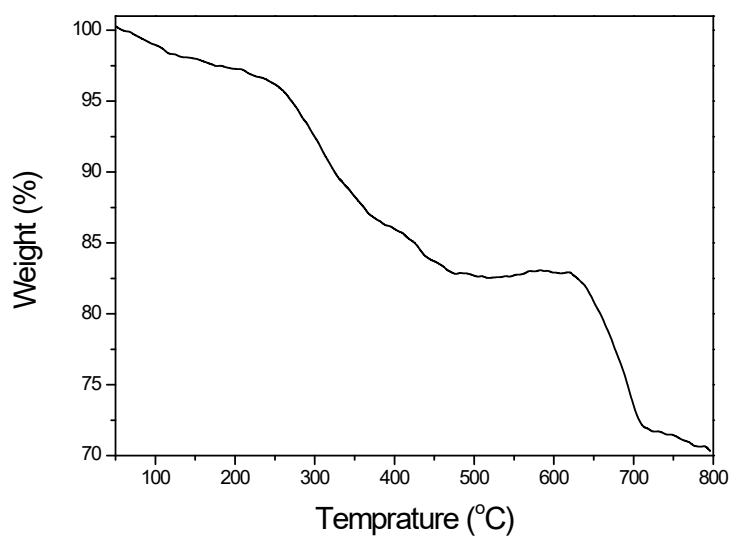

Figure S4. TGA curve of  $\text{SnO}_{0.3}\text{S}_{1.7}/\text{GNS}$  composites synthesized with 0.1 g GO by ultrasonic method.

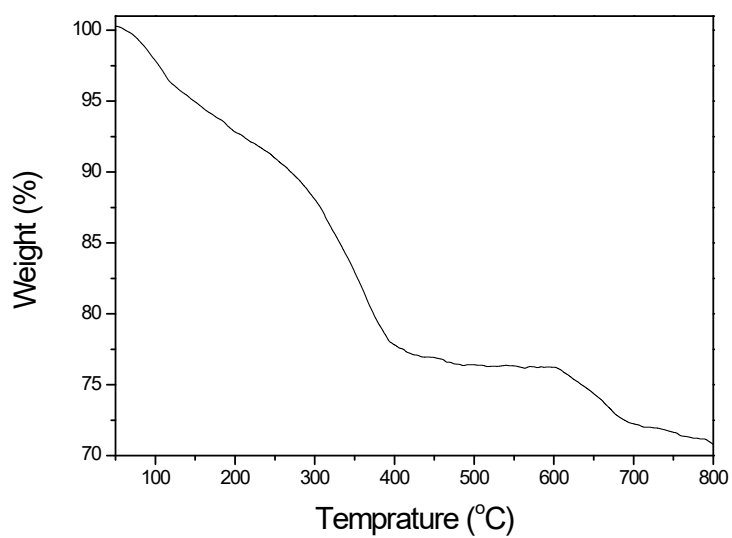

Figure S5. TGA curve of  $\text{SnO}_{1.2}\text{S}_{0.8}/\text{GNS}$  composites synthesized with 0.4 g GO by ultrasonic method.

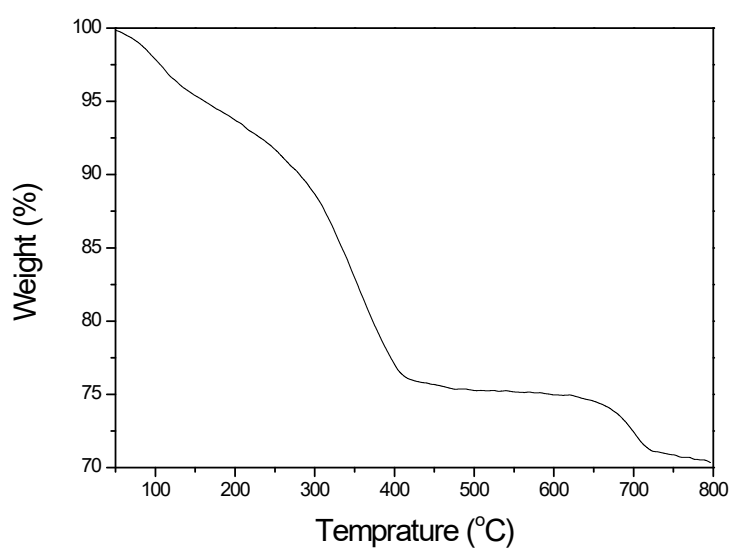

Figure S6. TGA curve of  $\text{SnO}_{1.3}\text{S}_{0.7}/\text{GNS}$  composites synthesized with 0.5 g GO by ultrasonic method.

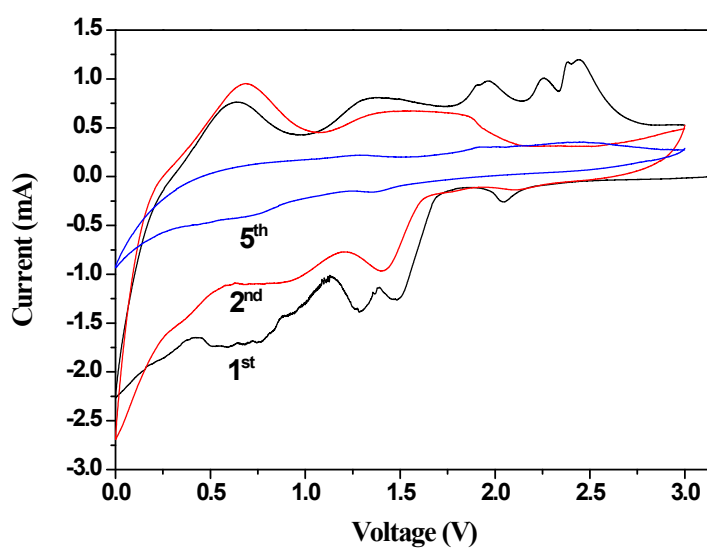

Figure S7. Cyclic voltammograms of composites SnO<sub>0.6</sub>S<sub>1.4</sub>/GNS cycled between 0.0 V and 3 V at a scan rate of 0.1 mV s<sup>-1</sup>.

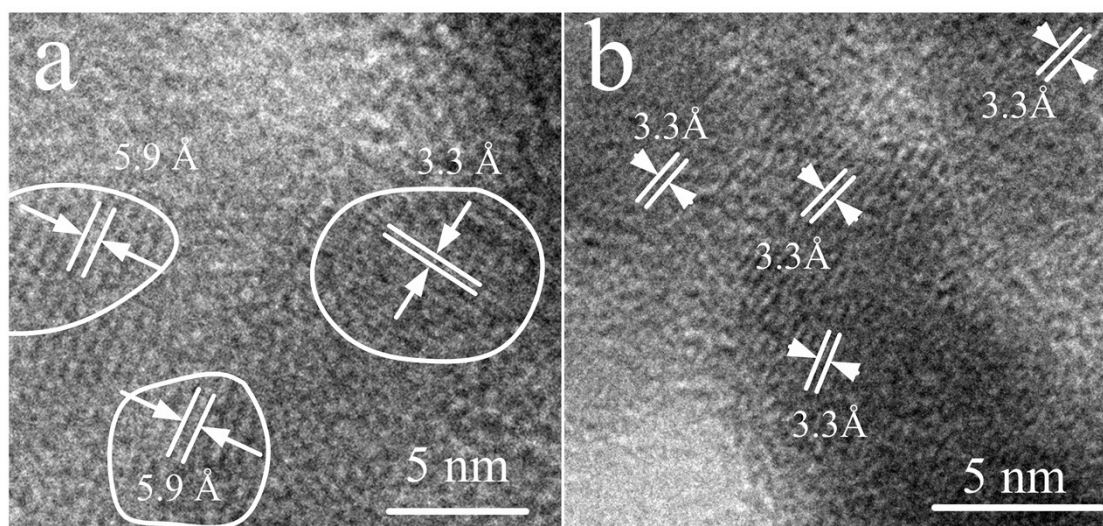

Figure S8. HRTEM images of composites SnOS/GNS (a) and SnO<sub>1.2</sub>S<sub>0.8</sub>/GNS; (b) after discharge-charge 50 cycles between 0.0 V and 3 V at 200 mA g<sup>-1</sup>.

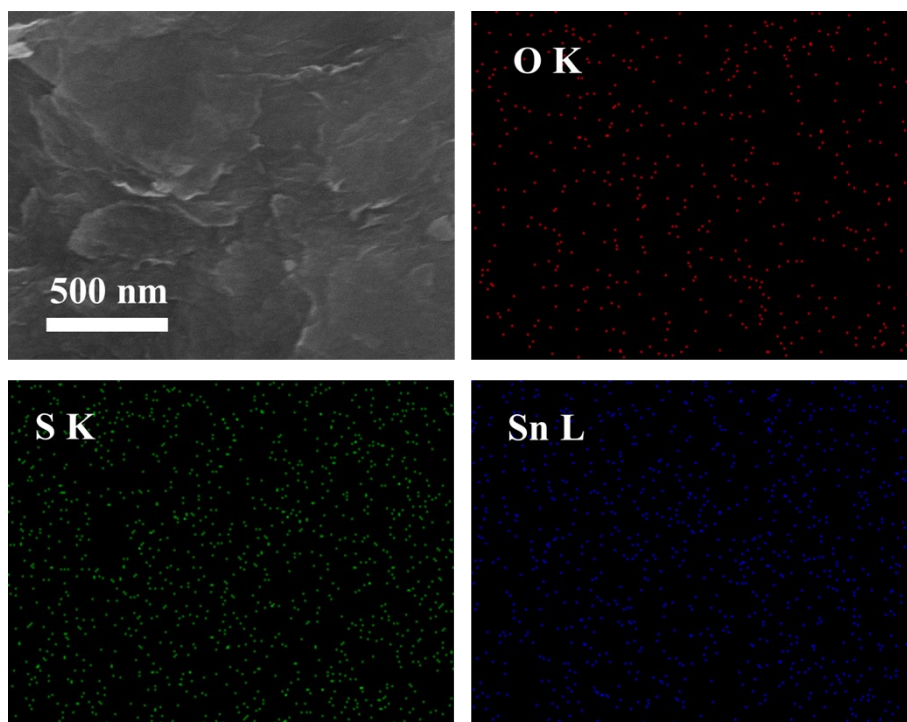

Figure S9. EDX images of SnOS/GNS nanocomposite.
